# Supplementary material for: Physical and Chemical Characterisation of Conventional and Nano/Emulsions: Influence of Vegetable Oils from Different Origins
Source: MDPI journal article supplement (doi:10.3390/foods11050681), 2022-02-25
Supplement: s1 [file s1]

**Table S1.** Fatty acid composition of oils (% of total fatty acids).

| Fatty Acid | Oil Type     |              |              |              |              |
|------------|--------------|--------------|--------------|--------------|--------------|
|            | EVOO         | CPRO         | OO           | RO           | SO           |
| C8:0       | ND           | ND           | ND           | ND           | ND           |
| C10:0      | ND           | ND           | ND           | ND           | ND           |
| C12:0      | ND           | ND           | ND           | ND           | ND           |
| C14:0      | ND           | ND           | ND           | ND           | ND           |
| C16:0      | 1.10 (0.16)  | ND           | 0.88 (0.01)  | 0.20 (0.01)  | ND           |
| C18:0      | 13.16 (0.47) | 4.88 (0.03)  | 12.40 (0.02) | 4.79 (0.02)  | 6.52 (0.13)  |
| C18:1      | 77.69 (1.43) | 74.39 (0.10) | 79.73 (0.08) | 74.11 (0.10) | 31.95 (1.75) |
| C18:2      | 8.04 (0.86)  | 20.73 (0.11) | 6.98 (0.08)  | 20.57 (0.10) | 61.53 (1.63) |
| C18:3      | ND           | ND           | ND           | 0.33 (0.01)  | ND           |
| SFA%       | 14.26 (0.59) | 4.88 (0.03)  | 13.28 (0.02) | 4.79 (0.02)  | 6.52 (0.13)  |
| MUFA%      | 77.69 (1.43) | 73.39 (0.10) | 79.73 (0.08) | 74.11 (0.10) | 31.95 (1.75) |
| PUFA%      | 8.04 (0.86)  | 20.73 (0.11) | 6.98 (0.08)  | 20.90 (0.09) | 61.53 (1.63) |
| Total      | 100.00       | 100.00       | 100.00       | 100.00       | 100.00       |

Indicated values are reported as means (standard deviation). ND—not detectable.

**Table S2.** Colour of vegetable oils: extra virgin olive oil (EVOO), cold-pressed rapeseed oil (CPRO), olive oil (OO), rapeseed oil (RO), sunflower oil (SO).

| Oils | <i>L</i> <sup>*</sup>     | <i>a</i> <sup>*</sup>     | <i>b</i> <sup>*</sup>     |
|------|---------------------------|---------------------------|---------------------------|
| EVOO | 55.46 <sup>c</sup> (2.74) | −9.52 <sup>e</sup> (0.20) | 69.00 <sup>b</sup> (4.07) |
| CPRO | 58.90 <sup>b</sup> (0.55) | −7.46 <sup>c</sup> (0.03) | 76.61 <sup>a</sup> (2.52) |
| OO   | 62.54 <sup>a</sup> (0.25) | −8.76 <sup>d</sup> (0.20) | 43.46 <sup>c</sup> (2.00) |
| RO   | 64.06 <sup>a</sup> (1.95) | −3.65 <sup>b</sup> (0.10) | 10.47 <sup>d</sup> (0.30) |
| SO   | 63.59 <sup>a</sup> (1.47) | −2.33 <sup>a</sup> (0.02) | 6.67 <sup>d</sup> (0.04)  |

Indicated values are reported as means (standard deviation). Values with the different superscript letters (within same column) are significantly different ( $p < 0.05$ ).

**Table S3.** Total phenolic content (TPC), free fatty acids (FFA), radical scavenging activity and thiobarbituric acid reactive substances (TBARS) of vegetable oils. Extra virgin olive oil (EVOO), cold-pressed rapeseed oil (CPRO), olive oil (OO), rapeseed oil (RO), sunflower oil (SO).

| Oils | TPC<br>(mg GAE/ kg<br>Oil)  | FFA (%)<br>Oleic Acid)     | Radical<br>Scavenging<br>Activity (%) | TBARS<br>(mmol/kg<br>Oil)  | Viscosity<br>(mPa·s)       | Density<br>(g/mL)                |
|------|-----------------------------|----------------------------|---------------------------------------|----------------------------|----------------------------|----------------------------------|
| EVOO | 202.64 <sup>a</sup> (13.96) | 0.312 <sup>a</sup> (0.073) | 34.15 <sup>a</sup> (2.64)             | 0.158 <sup>c</sup> (0.007) | 63.82 <sup>d</sup> (2.10)  | 0.9112 <sup>d</sup><br>(0.0002)  |
| CPRO | 50.43 <sup>c</sup> (11.71)  | 0.241 <sup>b</sup> (0.025) | 3.97 <sup>b</sup> (0.23)              | 0.278 <sup>a</sup> (0.020) | 58.45 <sup>b</sup> (2.90)  | 0.9143 <sup>b</sup><br>(0.0004)  |
| OO   | 91.98 <sup>b</sup> (5.88)   | 0.221 <sup>b</sup> (0.012) | 8.31 <sup>b</sup> (2.75)              | 0.200 <sup>b</sup> (0.013) | 65.84 <sup>cd</sup> (1.60) | 0.9122 <sup>cd</sup><br>(0.0016) |
| RO   | 85.14 <sup>b</sup> (11.71)  | 0.159 <sup>c</sup> (0.036) | 31.79 <sup>a</sup> (3.46)             | 0.092 <sup>d</sup> (0.018) | 57.72 <sup>bc</sup> (2.23) | 0.9140 <sup>bc</sup><br>(0.0004) |
| SO   | 31.90 <sup>d</sup> (1.75)   | 0.153 <sup>c</sup> (0.023) | 4.91 <sup>b</sup> (1.00)              | 0.011 <sup>e</sup> (0.002) | 53.97 <sup>a</sup> (3.67)  | 0.9187 <sup>a</sup><br>(0.0013)  |

Indicated values are reported as means (standard deviation). Values with the different superscript letters (within same column) are significantly different ( $p < 0.05$ ).
